---

1 **C1q/CTRP1 exerts neuroprotective effects in TBI rats**  
2 **by regulating inflammation and autophagy**

3 Ming Pei<sup>1, 2, 3¶</sup>, Chaoqun Wang<sup>4¶</sup>, Zhengdong Li<sup>2, 5</sup>, Jianhua Zhang<sup>2</sup>, Ping Huang<sup>2</sup>,

4 Jiawen Wang<sup>6</sup>, Jiang Huang<sup>6</sup>, Donghua Zou<sup>2, 6\*</sup>, Yijiu Chen<sup>1, 2\*</sup>

5 1. West China School of Basic Medical Sciences & Forensic Medicine, Sichuan University, Chengdu,

6 Sichuan province, China

7 2. Shanghai Key laboratory of Forensic Medicine, Academy of Forensic Science, Ministry of Justice,

8 Shanghai, China

9 3. Institute of Forensic Science, Xuzhou Public Security Bureau, Xuzhou, Jiangsu province, China

10 4. Department of Pathology, Xuzhou Medical University, Xuzhou, Jiangsu province, China

11 5. Department of Forensic Medicine, School of Basic Medical Sciences, Fudan University, Shanghai,

12 China

13 6. School of Forensic Medicine, Guizhou Medical University, Guiyang, Guizhou province, China

14 \*Corresponding author

15 E-mail: zoudh@ssfjd.cn (DZ)

16 E-mail: cyj1347@163.com (YC)

17 ¶ Ming Pei and Chaoqun Wang contributed equally to this work.

18

---

## 19 Abstract

20 **Objective:** C1q/CTRP1 is a newly discovered adiponectin protein, which is highly expressed in adipose  
21 and heart tissues. Recent studies have revealed that C1q/CTRP1 can regulate metabolism and inhibit  
22 inflammation. CTRP1 is also expressed in brain tissues and vascular cells of human and rat, and research  
23 on cerebral hemorrhage and cerebral ischemia-reperfusion injury demonstrates that the CTRP family can  
24 attenuate secondary brain injury and exert neuroprotective effects. Thus, this study was designed to  
25 explore the role of CTRP1 in traumatic brain injury (TBI) and the underlying mechanism.

26 **Main methods:** Rats were assigned into rCTRP1 group, vehicle group, and sham group. Modified  
27 Feeney's method was used to establish a closed traumatic brain injury model. Morris water maze was  
28 used for directional navigation, reverse searching and space exploration tests in rats. In addition, Golgi-  
29 Cox staining was utilized to visualize neurons, dendrites and dendritic spines. ELISA was conducted to  
30 detect the levels of inflammatory factors (IL-6 and TNF- $\alpha$ ). Finally, Western blot was adopted to detect  
31 the relative expression of *p*-mTOR and autophagy-related proteins (Beclin-1 and LC3-II).

32 **Results:** CTRP1 improved the behavioral and histopathological outcomes, inhibited the inflammatory  
33 response, activated mTOR and decreased autophagy-associated protein synthesis in TBI rats.

34 **Conclusion:** CTRP1 exerts neuroprotective effects in TBI rats by regulating inflammation and  
35 autophagy and has potential therapeutic properties after TBI.

36 **Keywords:** Autophagy; CTRP1; Inflammation; Neuroprotective effect; Traumatic brain injury

## 37 Introduction

38 Traumatic brain injury (TBI) is the main cause of traumatic death and disability globally. The common  
39 causes of TBI include violence, traffic accidents, tumble, falls, and sports accidents [1]. TBI is generally  
40 divided into primary and secondary brain injury. To be specific, primary TBI is caused by direct external

---

41 force acting on the central nervous system. Primary TBI often leads to neurometabolic disorders,  
42 hippocampal synapse damage, neuron, astrocytic degeneration (CA1/CA3 layer, dentate gyrus) and  
43 glutamate excitotoxicity. In addition, with the subsequent destruction of the blood-brain barrier (BBB)  
44 and the persistence of neurogenic inflammation [2], there are secondary changes in nerve tissues,  
45 including a series of pathophysiological changes, energy metabolism disorders and inflammatory  
46 response [3-5], which generally aggravate neuronal necrosis, dendrite and synapse damage [2]. Both  
47 primary and secondary TBI can directly cause cognitive and behavioral dysfunction in patients, which  
48 seriously affects the patient's quality of life [6,7]. Therefore, how to attenuate the damage of primary  
49 and secondary TBI on the nerve tissue and to enhance the neuroprotective effects has become the present  
50 research focus of neuroscience and trauma science.

51 C1q/TNF- related protein-1 (CTRP1) is a protein cytokine containing 281 amino acids, which belongs  
52 to the CTRP family. And the CTRP family is mostly involved in regulating inflammation and metabolism  
53 [8]. Similar to other CTRP family members, CTRP1 is expressed in adipose and heart tissues [9,10].  
54 CTRP1-deficient mice show increased myocardial infarction area caused by ischemia reperfusion injury  
55 (IRI), cardiomyocyte apoptosis and expression of pro-inflammatory genes, while the up-regulation of  
56 CTRP1 protein expression can attenuate myocardial injury, indicating that CTRP1 can regulate  
57 cardiomyocyte metabolism, inhibit inflammatory response and protect the damaged cardiomyocytes [10].  
58 Additionally, inflammatory response and pro-inflammatory cytokines can increase the secretion of  
59 CTRP1 [11-13]. Relevant studies have shown that the increased CTRP1 protein expression can suppress  
60 the inflammatory response caused by cerebral IRI [14]. Moreover, CTRP1 can regulate the autophagy of  
61 glial cells by activating the Akt/mTOR signaling pathway, thereby exerting neuroprotective effects [14].  
62 Based on the above research, this study aimed to confirm the effectiveness of CTRP1 on neuroprotection,

---

63 and to investigate its effect on memory, cognitive and behavioral functions in TBI rats. In addition, we  
64 further revealed the mechanism of the neuroprotective effects of CTRP1 in TBI rats.

## 65 **1. Materials and methods**

### 66 **1.1 Animals**

67 The use of animals and the animal procedures were conducted following the guidelines approved and  
68 formulated by the Animal Care and Use Committee of the Xuzhou Medical University. A total of 80  
69 healthy male specific pathogen free (SPF) Sprague-Dawley (SD) rats (10 to 12 weeks old, 220 to 250 g  
70 of weight) were purchased from the Animal Experimental Center of Xuzhou Medical University. Rats  
71 were maintained under SPF condition, with the temperature of  $25\pm 1$  °C, the relative humidity of 40%-60%  
72 and the light/dark cycle of 12 h/12 h. Rats were freely accessible to food and water. The rats were  
73 adaptively fed for one week before the experiment. All surgery was performed under sodium  
74 pentobarbital anesthesia, and all efforts were made to minimize suffering.

### 75 **1.2 Construction of the TBI model**

76 The modified Feeney's method was used to establish the closed TBI model<sup>16</sup>. In brief, rats were fasted  
77 and deprived of water for 12 h before operation. The head was fixed on the stereotaxic apparatus,  
78 followed by shearing and disinfection of the operation area. Afterwards, the scalp was cut along the  
79 midline sagittal of the head to expose the right parietal skull. To penetrate the skull and open a circular  
80 window 5 mm in diameter while preventing endocranial injury, a dental drill was used on the skull at a  
81 distance of 3.5 mm to the right of the skull midline and about 0.2 mm from the bregma. Subsequently,  
82 a 40 g skull batting stick was released from a height of 20 cm of the stereotaxic apparatus vertically  
83 fixed to the cannula, so as to control the subsidence depth of 0.2 cm and the diameter of striking end of  
84 approximately 0.2 cm, causing contusion of the right hemisphere. Finally, the skull defect was sealed

---

85 with bone wax, and the scalp was intermittently sutured. Rats in the sham group were subjected to skull  
86 window exposure without further hitting. Symptoms such as limb twitch, urinary incontinence, nasal  
87 bleeding and a few seconds of apnea were shown in rats after the hit. Based on the neurological  
88 severity score (NSS) at 0.5 h and 1 h after injury, the rats with common TBI were screened, excluding  
89 eight rats that died or did not present moderate TBI.

### 90 **1.3 Grouping and drug administration**

91 The remaining 72 rats were randomly grouped into three categories matching the NSS results,  
92 including the rCTRP1 group (TBI + rCTRP1 recombinant protein), which was given an acute  
93 intracerebroventricular injection of 80 µg/kg mouse-derived rCTRP1 recombinant protein  
94 (ANNORON, China) every 24 h for up to 7d from half an hour after TBI; the vehicle group (TBI  
95 +vehicle), which was administered with the same amount of normal saline at equal frequency to that of  
96 the rCTRP1 group after craniocerebral trauma; and the sham group, which received a craniotomy  
97 without TBI. Three time points after TBI, namely, 24 h, 72 h and 1 w, were chosen, and eight rats in  
98 each group were examined at each time point.

### 99 **1.4 Morris water maze**

100 The Morris water maze consisted of a round dark metallic pool 160 cm in diameter and 60 cm in depth  
101 that was filled with water ( $22\pm 0.5^{\circ}\text{C}$ ). Water was made opaque by the addition of a dark nontoxic  
102 water-based paint to a depth of 50 cm and surrounded by a dark curtain. The pool was virtually divided  
103 into four quadrants. An escape platform (12 ×12 cm) was submerged at 1 cm below the opaque water  
104 surface and located in the center of one quadrant of the maze, approximately 30 cm from the edge of  
105 pool. Randomized to one of the four quadrants, rats were allowed to search for the hidden platform for  
106 1 min. The rats were placed on the platform manually for 15 s if they exceeded the allotted time. Rats

---

107 were trained for five consecutive days before the experiment. Then, at 24 h, 72 h and 1 w after TBI,  
108 rats were allowed to seek the platform in the 1-min test. After the water maze, rats were sacrificed.  
109 Hippocampal tissue samples were immediately removed and stored at -80°C.

## 110 **1.5 Golgi-Cox staining and microscopy procedures**

111 One side of the hippocampus of rats in each group was transferred into the impregnation solution at room  
112 temperature based on the instructions of the Golgi-Cox OptimStain Prekit (HiTO, USA). The  
113 impregnation solution was placed and stored at room temperature in dark for two weeks. The tissue was  
114 subsequently transferred into solution-3 for 12 h at 4°C. Then solution-3 was replaced and stored for 48  
115 h at 4°C. The temperature of isopentane was attenuated to -70 °C using dry ice. The hippocampal tissue  
116 was then immersed in the isopentane and cooled down for approximately 40 s, and the absorbent paper  
117 was used to remove excess isopentane from the tissue. The freezing microtome was pre-cooled to -19°C,  
118 which was used to slowly cut the tissue into sections 120-µm in thickness. The sections were transferred  
119 to a gelatin-coated slide and dried at room temperature in darkness overnight. Thereafter, the slides were  
120 rinsed in distilled water twice for 3 min each time. Later, the slides were placed in the staining mixing  
121 solution for 10 min and then in renewed distilled water twice for 4 min each time. The slides were then  
122 dehydrated in 50%, 75% and 95% ethanol (5 min each) and in 100% ethanol thrice (5 min each).  
123 Afterwards, the slides were cleaned in xylene twice (5 min each), sealed with a coverslip, and viewed by  
124 light microscopy. At least 10 neurons were randomly selected in each slice (magnification 200 times) by  
125 a trained observer blind to the experimental condition. Equi-distant (10 µm) concentric rings were placed  
126 over the tracings of the dendritic tree. The total dendritic arborization and dendritic length were measured  
127 by the amount of ring intersections with the dendritic tree. Over 10 primary dendritic branches at a length  
128 of  $\geq 20\mu\text{m}$  were traced (at 1000×). The amount of dendritic spine was computed utilizing the analysis

---

129 system of Image pro-plus 6.0.

## 130 **1.6 Detection of IL-6 and TNF- $\alpha$ by ELISA**

131 Hippocampal tissue was harvested immediately and homogenized in lysis buffer, followed by  
132 centrifugation at 8000g for 10 min at 4°C to collect the supernatants. The levels of IL-6 and TNF- $\alpha$   
133 were determined by ELISA kit purchased from Abcam Company (ab100785 and ab100772, Abcam,  
134 America) according to the manufacturer's instruction.

## 135 **1.7 Western blot analysis**

136 Hippocampal tissue was centrifuged at 12000 rpm for 15 min and homogenized in ice-cold tissue lysis  
137 buffer (50 mm Tris, PH 7.5, 0.15 mm NaCl, 2% NP-40, 0.5% sodium deoxycholate, 4% SDS, and  
138 protease and phosphatase inhibitor cocktails) for 15 min. In every supernatant fraction, the BAC protein  
139 assay kit was used to measure the total protein concentration (Pierce, Rockford, IL, USA), and 15  $\mu$ g  
140 Beclin-1, LC3-II and *p*-mTOR were separated by electrophoresis and then transferred onto the  
141 nitrocellulose membranes (Bio-Rad; Trans-Blot Turbo Transfer System). After several washes with  
142 TBST buffer, the membranes were blocked for 2 h with the blocking buffer (LI-COR Biosciences,  
143 Lincoln, Nebraska, USA) and later incubated with rabbit anti-Beclin-1 (1:4000; Abcam, America), rabbit  
144 anti-LC3-II (1:2000; Abcam, America), polyclonal rabbit Anti-mTOR (1:5000, Abcam, America), and  
145 rabbit anti-GAPDH (1:10,000; Abcam, America) in TBST at 4°C overnight. After four washes, the HRP-  
146 linked secondary antibodies (1:5,000, Boster Bioengineering, China) were incubated in dark for 1 h. The  
147 Image J software was used to quantify the bands (NIH, Bethesda, MD, USA).

## 148 **1.8 Statistical analysis**

---

149 The description of continuous variables in our dataset was expressed as mean  $\pm$  standard deviation. The  
150 repeated measurement ANOVA was employed to analyze the behavioral statistics during the training  
151 period. The one-way ANOVA was utilized to examine the spine density, dendritic length and  
152 branching, as well as the ELISA and Western blot data. Further multiple comparisons were undertaken  
153 via the LSD method if the overall ANOVA analysis was significant. All the statistical analyses in the  
154 present study were implemented by the SPSS software (version 19.0 for Windows, SPSS Inc., USA)  
155 and the significance level was set to be 0.05 throughout our study.

## 156 **2 Results**

### 157 **2.1 The expression of CTRP1 in hippocampus**

158 The expression of CTRP1 in rat hippocampus was detected at 24 h after TBI. The results showed that  
159 the expression of CTRP1 increased in rCTRP1 group and vehicle group compared with sham group (p  
160 <0.001). In addition, the expression of CTRP1 was significantly higher in rCTRP1 group than that in  
161 vehicle group (p<0.001) (Fig 1A B).

162 **Fig 1. Expression of CTRP1 in hippocampus at 24h after TBI.** \*\*\* p < 0.001 vs. sham group, ###p  
163 < 0.001 vs vehicle group.

### 164 **2.2 Results of memory and spatial learning**

#### 165 **2.2.1 Spatial orientation ability**

166 The escape latency is defined as the time from entering water to boarding the platform of rats, which is  
167 one of the commonly indicators of spatial orientation ability. In this study, the escape latency time was  
168 detected in rats of three different groups at 24 h, 72 h, and 1 w after craniocerebral trauma. As a result,  
169 the escape latency was significantly longer in rCTRP1 group and vehicle group than that in sham group  
170 at the first two time points (p<0.005), and there was no significant difference in the escape latency



---

171 between rCTRP1 group and sham group at 1 w after craniocerebral trauma. However, the time was  
172 significantly shorter in rCTRP1 group than that in vehicle group at 1 w after TBI ( $p < 0.05$ ) (Fig 2A).

173 **Fig 2. The results of two Morris water maze tests in three groups at 24h, 72h and 1w after TBI. (A)**

174 Escape latency to locate the target platform. **(B)** Escape latency of reverse searching to locate the target

175 platform. **(C)** After the platform was removed, the number of entries into the target quadrant (TA). \* $p <$

176 0.05 vs. sham group, \*\*  $p < 0.005$  vs. sham group, \*\*\* $p < 0.001$  vs. sham group, #  $p < 0.05$  vs vehicle

177 group.

### 178 **2.2.2 Reverse searching ability**

179 The second quadrant of the platform was changed to the fourth quadrant, followed by re-examination of

180 the escape latency of rats, which was used as an indicator of working memory ability. The escape latency

181 of reserve searching was significantly prolonged in rCTRP1 group and vehicle group than that in sham

182 group at 24 h and 72 h after craniocerebral trauma ( $p < 0.05$ ), and there was no significant difference in

183 the time between rCTRP1 group and sham group at 1 w after craniocerebral trauma. However, the time

184 was significantly shorter in rCTRP1 group than that in vehicle group at 1 w after TBI ( $p < 0.05$ ) (Fig 2B).

### 185 **2.2.3 Spatial exploration ability**

186 The number of entries into the target quadrant (TA) after removing the underwater platform is one of the

187 commonly used indicators to detect the spatial exploration ability of rats. In this study, the number of

188 entries into the TA was significantly less in rCTRP1 group and vehicle group than that in sham group at

189 24 h and 72 h after TBI ( $p < 0.05$ ), and there was no significant difference in the number between rCTRP1

190 group and sham group at 1 w after craniocerebral trauma. While the number significantly increased in

191 rCTRP1 group compared to vehicle group at 1 w after TBI ( $p < 0.05$ ) (Fig 2C).

## 192 **2.3 Changes in dendrites and dendritic spines**

193 The alterations in dendrites and dendritic spines were observed at 24 h, 72 h and 1 w after TBI,  
194 respectively. The length and branches of dendrites significantly decreased in rCTRP1 group and  
195 vehicle group than those in sham group at 72 h and 1 w after TBI ( $p < 0.05$ ), and there was no  
196 significant difference in those between rCTRP1 group and sham group at 24 h after craniocerebral  
197 trauma. Moreover, the length and branches of dendrites significantly increased in rCTRP1 group  
198 compared to those in vehicle group at 1 w after TBI ( $p < 0.05$ ) (Fig 3ABC, Fig 4A). The dendritic spines  
199 decreased in rCTRP1 group and vehicle group than those in sham group at 24 h and 72 h after TBI  
200 ( $p < 0.005$ ), and there was no significant difference in those between rCTRP1 group and sham group at 1  
201 w after craniocerebral trauma. However, the dendritic spines significantly increased in rCTRP1 group  
202 compared to those in vehicle group at 72 h and 1 w after TBI ( $p < 0.05$ ) (Fig 3 DEF, Fig 4B).

203 **Fig 3. Changes in dendrites and dendritic spines at 72h after TBI.** (A) (the black bar is 50  $\mu\text{m}$ ) and  
204 (D) (the black bar is 10  $\mu\text{m}$ ), sham group; (B) and (E), vehicle group; (C) and (F), rCTRP1 group.

205 **Fig 4. The histogram of changes in dendrites and dendritic spines at 24h, 72h and 1w after TBI.**

206 (A) The number of ring intersections of the dendritic arborization. (B) The density of the dendritic  
207 spines. \*  $p < 0.05$  vs. sham group, \*\* $p < 0.005$  vs. sham group, \*\*\*  $p < 0.001$  vs. sham group, #  $p <$   
208  $0.05$  vs vehicle group.

## 209 **2.4 Effects of CTRP1 protein on neuroinflammation**

210 As presented in Fig. 5, after TBI, enhanced concentrations of TNF- $\alpha$  in rCTRP1 group and vehicle group  
211 were observed at 24 h, 72 h and 1 w after TBI compared to sham group ( $p < 0.05$ ); typically, the  
212 concentrations rapidly increased within 24 h after TBI and then slowly recovered to normal levels. The  
213 change trend of IL-6 concentrations in the three groups was similar to that of TNF- $\alpha$  at the three time  
214 points. The IL-6 and TNF- $\alpha$  levels in rCTRP1 group significantly decreased compared to those in vehicle

---

215 group at 24 h and 72 h after TBI ( $p < 0.001$ ). The results suggested that the inflammatory response was  
216 relatively significant within 1 w after craniocerebral trauma and CTRP1 exerted anti-inflammatory  
217 effects in the early stage of injury.

218 **Fig 5. The changes of TNF- $\alpha$  and IL-6 levels in each group at different time points after**  
219 **craniocerebral trauma.** \*  $p < 0.05$  vs. sham group, \*\*  $p < 0.005$  vs. sham group, \*\*\*  $p < 0.001$  vs.  
220 sham group, ###  $p < 0.001$  vs vehicle group.

## 221 **2.5 Effects of CTRP1 protein on autophagy**

222 Western blot was used to detect the expression of Beclin-1, LC3- II and  $p$ -mTOR in the hippocampus  
223 at 24 h, 72 h and 7 d after TBI and to demonstrate the changes in autophagy after TBI and the regulatory  
224 roles of CTRP1 on autophagy (Fig 6ABCD). The expression of the autophagy-related proteins Beclin-1  
225 and LC3- II in hippocampus of vehicle group was significantly higher than that in sham group at 24 h,  
226 72 h, and 1 w after craniocerebral trauma ( $p < 0.05$ ). The properly increased level of autophagy can  
227 attenuate cellular functions and decrease energy consumption, which is one of the self-protection  
228 mechanisms of damaged cells. However, intense autophagy can also cause cell death. The expression of  
229 Beclin-1 and LC3- II in hippocampus tissue in rCTRP1 group was significantly lower than that in  
230 vehicle group at three time points ( $p < 0.001$ ), indicating that CTRP1 attenuated autophagic injury after  
231 craniocerebral trauma. The expression of  $p$ -mTOR was significantly lower in vehicle group than that in  
232 sham group at 24 h, 72 h and 7 d after TBI ( $p < 0.001$ ). Additionally, the expression of  $p$ -mTOR was  
233 significantly higher in rCTRP1 group than that in vehicle group at three time points ( $p < 0.001$ ), suggesting  
234 that the CTRP1 recombinant protein was involved in the regulation of the mTOR pathway.

235 **Fig 6. Western-blot analysis was used to detect the expression of  $p$ -mTOR, Beclin-1 and LC3- II**  
236 **in the hippocampus of each group after craniocerebral trauma. (A) Relative expression of  $p$ -mTOR,**

---

237 Beclin-1 and LC3- II in each group at three time points. **(B-D)** The histogram of the expression of *p*-  
238 mTOR, Beclin-1 and LC3- II in each group at 24h, 72h and 1w after craniocerebral trauma. \* $p < 0.05$   
239 vs. sham group, \*\* $p < 0.005$  vs. sham group, \*\*\* $p < 0.001$  vs. sham group, #### $p < 0.001$  vs vehicle  
240 group.

### 241 **3 Discussion**

242 CTRP1 is a secretory glycoprotein that is expressed in the heart, liver, kidney, placenta, brain and  
243 interstitial vascular cells (including macrophages) in human and rat [15-18]. Previous studies have shown  
244 that the level of circulating CTRP1 elevates in patients with type 2 diabetes [19-20], coronary artery  
245 disease [21] and hypertension [22], and CTRP1 may be involved in the vasculitis and coagulation process  
246 in the acute phase of Kawasaki disease [23]. Studies have also demonstrated that CTRP1 possesses  
247 insulin-sensitizing effects [24,25]. Recent studies have revealed that the expression of CTRP1  
248 significantly increases in the serum of stroke patients, and is positively correlated with the high-  
249 sensitivity C-reactive protein, suggesting that CTRP1 may exert a neuroprotective effect after ischemic  
250 stroke [14]. In our study, we found that the expression of CTRP1 increased in the hippocampus of rats  
251 at 24 h after craniocerebral trauma and CTRP1 improved the behavioral and histopathological outcomes,  
252 indicating that CTRP1 might exert a neuroprotective effect after craniocerebral trauma, which was  
253 consistent with the above studies concerning stroke.

254 A variety of studies have reported that CTPR1 can inhibit inflammation. For instance, CTPR1 protects  
255 the heart from IRI by attenuating myocardial cell apoptosis and inflammation [26]. CTRP1 is associated  
256 with ischemic heart disease. The myocardial infarction area, cardiomyocyte apoptosis and pro-  
257 inflammatory gene expression following IRI are up-regulated in CTPR1 knockout mice, compared with  
258 wild-type (WT) mice. In contrast, the up-regulation of CTRP1 protein can attenuate myocardial damage

---

259 after IRI in WT mice. Treatment of cardiomyocytes with CTRP1 can reduce the hypoxia-reoxygenation-  
260 induced apoptosis and the LSP-stimulated expression of proinflammatory cytokines, which can be  
261 reversed by inhibiting the sphingosine-1-phosphate (S1P) signaling [26]. Therefore, CTRP1 can be used  
262 as an endogenous cardioprotective factor with anti-apoptotic and anti-inflammatory effects. In addition,  
263 the detection of CTRP1 expression in the plasma of patients with different types of stroke reveals that  
264 the expression level of CTRP1 in atherosclerosis-related strokes is significantly lower than that in other  
265 types of strokes, indicating that CTRP1 may be involved in the occurrence and development of stroke  
266 via atherosclerosis and the mechanism is associated with the suppression of inflammatory response of  
267 macrophages, thereby protecting brain function [27]. In our study, we found that rCTRP1 decreased the  
268 expression of inflammatory factors (TNF- $\alpha$  and IL-6) in the hippocampus of rats after TBI.

269 Autophagy exerts a dual role in TBI. On the one hand, enhanced autophagy can remove the damaged  
270 proteins and organelles, and reduce mitochondrial energy consumption, which are beneficial to maintain  
271 cell homeostasis. On the other hand, the enhanced autophagy can simultaneously destroy functional  
272 macromolecular substances and organelles in cells to aggravate cell damage [28]. Autophagy is regulated  
273 by a variety of molecular mechanisms, and the Akt/mTOR signaling pathway plays an important role in  
274 regulating autophagy [29]. In addition, the Akt/mTOR pathway attenuates neuronal apoptosis by  
275 suppressing calcification-dependent pathways, which has a protective effect in neurological diseases  
276 [30,31]. CTRP1 can specifically activate the Akt (protein kinase B) [32] and MAPK signaling pathways  
277 in myotubes of the differentiated mice [25]. Huilin Wang *et al.* [14] found that activation of the  
278 Akt/mTOR pathway by IGF-1 significantly inhibited the promoting role of si-CTRP1 in microglial  
279 autophagy, while A6730 inhibited the Akt and reversed the inhibitory effect of CTRP1 recombinant  
280 protein on microglial autophagy. Consistent with previous reports, we discovered that rCTRP1 reduced

---

281 the expression of hippocampal autophagy-related proteins LC3-II and Beclin-1 by activating the mTOR  
282 signaling pathway in rats, and exerted an inhibitory effect on autophagy in hippocampus tissue after TBI,  
283 thereby decreasing autophagic injury caused by craniocerebral trauma. These findings suggest that  
284 rCTRP1 plays a neuroprotective effect by activating the mTOR signaling pathway.

## 285 **4. Conclusion**

286 In this study, we find that the CTRP1 recombinant protein can improve the behavioral and  
287 histopathological outcomes, inhibit inflammatory response, activate mTOR and decrease autophagy-  
288 associated protein synthesis in TBI rats. Therefore, CTRP1 exerts neuroprotective effects in TBI rats by  
289 regulating inflammation and autophagy and has potential therapeutic properties after TBI.

290

## 291 **CONFLICT OF INTEREST**

292 The authors declare that there are no conflicts of interest in the authorship or publication of the  
293 contribution.

294

## 295 **REFERENCES**

- 296 1. DeKosky ST, Asken BM. Injury cascades in TBI-related neurodegeneration. *Brain Inj.* 2017;31(9):1177–  
297 82.
- 298 2. Shandra O, Winemiller A, Heithof B, Munoz-Ballester C, George, Kijana, et al. Repetitive diffuse mild  
299 traumatic brain injury causes an atypical astrocyte response and spontaneous recurrent seizures. *J*  
300 *Neurosci.* 2019;39(10):1944–63.
- 301 3. Adams JH, Doyle D, Graham DI, LAWRENCE AE, McLELLAN DR, GENNARELLI TA, et al. The contusion  
302 index: A reappraisal in human and experimental non-missile injury. *Neuropathol Appl Neurobiol.*  
303 1985;11(4):299-308.
- 304 4. Alessandrini A, Namura S, Moskowitz MA, Bonventre JV. MEK1 protein kinase inhibition protects  
305 against damage resulting from focal cerebral ischemia. *Proc Natl Acad Sci USA.* 1999; 96(22): 12866-  
306 12869.
- 307 5. Artuso M, Esteve A, Bresil H, Vuillaume M, Hall J, et al. The role of the Ataxia telangiectasia gene in  
308 the p53, WAF1/CIP1(p21)- and GADD45-mediated response to DNA damage produced by ionizing  
309 radiation. *Oncogene.* 1995; 11(8):1427-1435.

- 
- 310 6. Kraus JF, McArthur DL. Epidemiologic aspects of brain injury. *Neurol Clin.* 1996; 14(2):435-50.
- 311 7. Raymont V, Salazar AM, Krueger F, Grafman J. "Studying injured minds": the- Vietnam head injury
- 312 study and 40 years of brain injury research. *Front Neurol.* 2011; 2:1-13.
- 313 8. Weng H, Pei Q, Yang M, Zhang J, Yi Q. Hypomethylation of C1q/tumor necrosis factor-related protein-
- 314 1 promoter region in whole blood and risks for coronary artery aneurysms in Kawasaki disease. *Int J*
- 315 *Cardiol.* 2020; 307:159-163.
- 316 9. Yang Y, Liu S, Zhang RY, Luo H, Chen L, He WF, et al. Association between c1q/tnf-relatedprotein-
- 317 1levels in human plasma and epicardial adipose tissues and congestive heart failure. *Cell. Physiol.*
- 318 *Biochem.* 2017; 42 (5) :2130–2143.
- 319 10. Yuasa D, Ohashi K, Shibata R, Ouchi N, Kataoka Y, Kambara T, et al. C1q/TNF-related protein-1
- 320 functions to protect against acute ischemic injury in the heart. *FASEB J.* 2016;30 (3) :1065–1075.
- 321 11. Lu L, Zhang RY, Wang XQ, Liu ZH, Shen Y, Ding FH, et al. C1q/TNF-related protein-1: an adipokine
- 322 marking and promoting atherosclerosis. *Eur Heart J.* 2016;37(22):1762–71.
- 323 12. Muendlein A, Leihner A, Saely C, Ebner J, Geiger K, Brandtner EM, et al. The novel adipokine CTRP1
- 324 is significantly associated with the incidence of major adverse cardiovascular events. *Atherosclerosis.*
- 325 2019; 286:1–6.
- 326 13. Kim D, Park SY. C1q and TNF related protein 1 regulates expression of inflammatory genes in
- 327 vascular smooth muscle cells. *Genes Genomics.* 2019;41(4):397–406.
- 328 14. Wang HL, Liu QH, Zhang XJ. C1q/tumor necrosis factor-related protein-1 attenuates microglia
- 329 autophagy and inflammatory response by regulating the Akt/mTOR pathway. *Life*
- 330 *Sciences.* 2020;256:117992.
- 331 15. Si Y, Fan W, Sun L. A Review of the Relationship Between CTRP Family and Coronary Artery Disease.
- 332 *Curr Atheroscler Rep.* 2020;22(6) :22.
- 333 16. Wong GW, Krawczyk SA, Kitidis-Mitrokostas C, Revett T, Gimeno R, Lodish HF. Molecular,
- 334 biochemical and functional characterizations of C1q/ TNF family members: adipose-tissue-selective
- 335 expression patterns, regulation by PPAR-gamma agonist, cysteine-mediated oligomerizations,
- 336 combinatorial associations and metabolic functions. *Biochem. J.* 2008; 416 (2) :161-77.
- 337 17. Schaffler A, Buechler C. CTRP family: linking immunity to metabolism. *Trends Endocrinol. Metab.*
- 338 2012; 23(4):194-204.
- 339 18. Kim KY, Kim HY, Kim JH, Yang Y. Tumor necrosis factor-alpha and interleukin-1beta increases CTRP1
- 340 expression in adipose tissue. *FEBS Lett.* 2006; 580(16): 3953-3960.
- 341 19. Pan X, Lu T, Wu F, Jin L, Zhang Y, Shi L, et al. Circulating complement C1q TNF-related protein 1 levels
- 342 are increased in patients with type 2 diabetes and are associated with insulin sensitivity in Chinese
- 343 subjects. *PLoS One.* 2014; 9 (5) :94478.
- 344 20. Xin Y, Lyu X, Wang C, Fu Y, Zhang S, Tian C, et al. Elevated circulating levels of CTRP1, a novel
- 345 adipokine, in diabetic patients. *Endocr. J.* 2014; 61 (9) :841–847.
- 346 21. Shen Y, Lu Y, Liu ZH, Wu F, Zhu JZ, Shen WF, et al. Increased serum level of CTRP1 is associated with
- 347 low coronary collateralization in stable angina patients with chronic total occlusion. *Int. J. Cardiol.* 2014;
- 348 174 (1) :203–206.
- 349 22. Jeon JH, Kim KY, Kim JH, Baek A, Yang Y, Lee YH, et al. A novel adipokine CTRP1 stimulates
- 350 aldosterone production. *FASEB J.* 2008; 22 (5):1502–1511.
- 351 23. Feng S, Su Y, Luo L, Jing F, Yi Q. Serum levels of C1q/tumor necrosis factor related protein-1 in
- 352 children with Kawasaki disease. *Pediatr. Res.* 2018; 83 (5): 999–1003.
- 353 24. Wong GW, Krawczyk SA, Kitidis-Mitrokostas C, Revett T, Gimeno R, Lodish HF. Molecular,

- 354 biochemical and functional characterizations of C1q/TNF family members: adipose tissue-selective  
355 expression patterns, regulation by PPAR-gamma agonist, cysteine-mediated oligomerizations,  
356 combinatorial associations and metabolic functions. *Biochem. J.* 2008; 416:161–177.
- 357 25. Peterson JM, Aja S, Wei Z, Wong GW. CTRP1 protein enhances fatty acid oxidation via AMP-  
358 activated protein kinase (AMPK) activation and acetyl-CoA carboxylase (ACC) inhibition. *J. Biol.*  
359 *Chem.* 2012; 287: 1576–158.
- 360 26. Yuasa D, Ohashi K, Shibata R, Mizutani N, Kataoka Y, Kambara T, et al. C1q/TNF-related protein-1  
361 functions to protect against acute ischemic injury in the heart. *FASEB J.* 2016;30 (3):1065–1075.
- 362 27. Li SP, Xie Y, Xu F, Liang Y, He BM, Sun HB. The expression of C1q/TNF-related protein-1 in patients  
363 with acute ischemic stroke and its predictive value for the severity of neurological deficits. *The Journal*  
364 *of Practical Medicine.* 2018; 34(10).
- 365 28. Xing S, Zhang Y, Li J, Zhang J, Li Y, Dang C, et al. Beclin 1 knockdown inhibits autophagic activation  
366 and prevents the secondary neurodegenerative damage in the ipsilateral thalamus following focal  
367 cerebral infarction. *Autophagy.* 2012; 8:63-76.
- 368 29. Shinjima N, Yokoyama T, Kondo Y, Kondo S. Roles of the Akt/mTOR/p70S6K and ERK1/2 signaling  
369 pathways in curcumin-induced autophagy. *Autophagy.* 2007; 3 (6):635–637.
- 370 30. Zhang R, Zhu Y, Dong X, Liu B, Zhang N, Wang X, et al. Celastrol Attenuates Cadmium-Induced  
371 Neuronal Apoptosis via Inhibiting Ca<sup>2+</sup>-CaMKII-Dependent Akt/mTOR Pathway: Celastrol attenuates  
372 Cd neurotoxicity via Ca<sup>2+</sup> signaling. *J Cell Physiol.* 2017; 232(8):2145-2157.
- 373 31. Hou Y, Wang K, Wan W, Cheng Y, Pu X, Ye X. Resveratrol provides neuroprotection by regulating the  
374 JAK2/STAT3/PI3K/AKT/mTOR pathway after stroke in rats. *Genes Dis.* 2018; 5 (3):245–255.
- 375 32. Chen H, Gao L, Huang Z, Liu Y, Guo S, Xing J, et al. C1q/TNF-related protein 1 attenuates doxorubicin-  
376 induced cardiac injury via activation of AKT. *Life Sci.* 2018; 207:492–498.

377

## 378 **Supporting information**

379 **S1 Dataset. Raw data.**



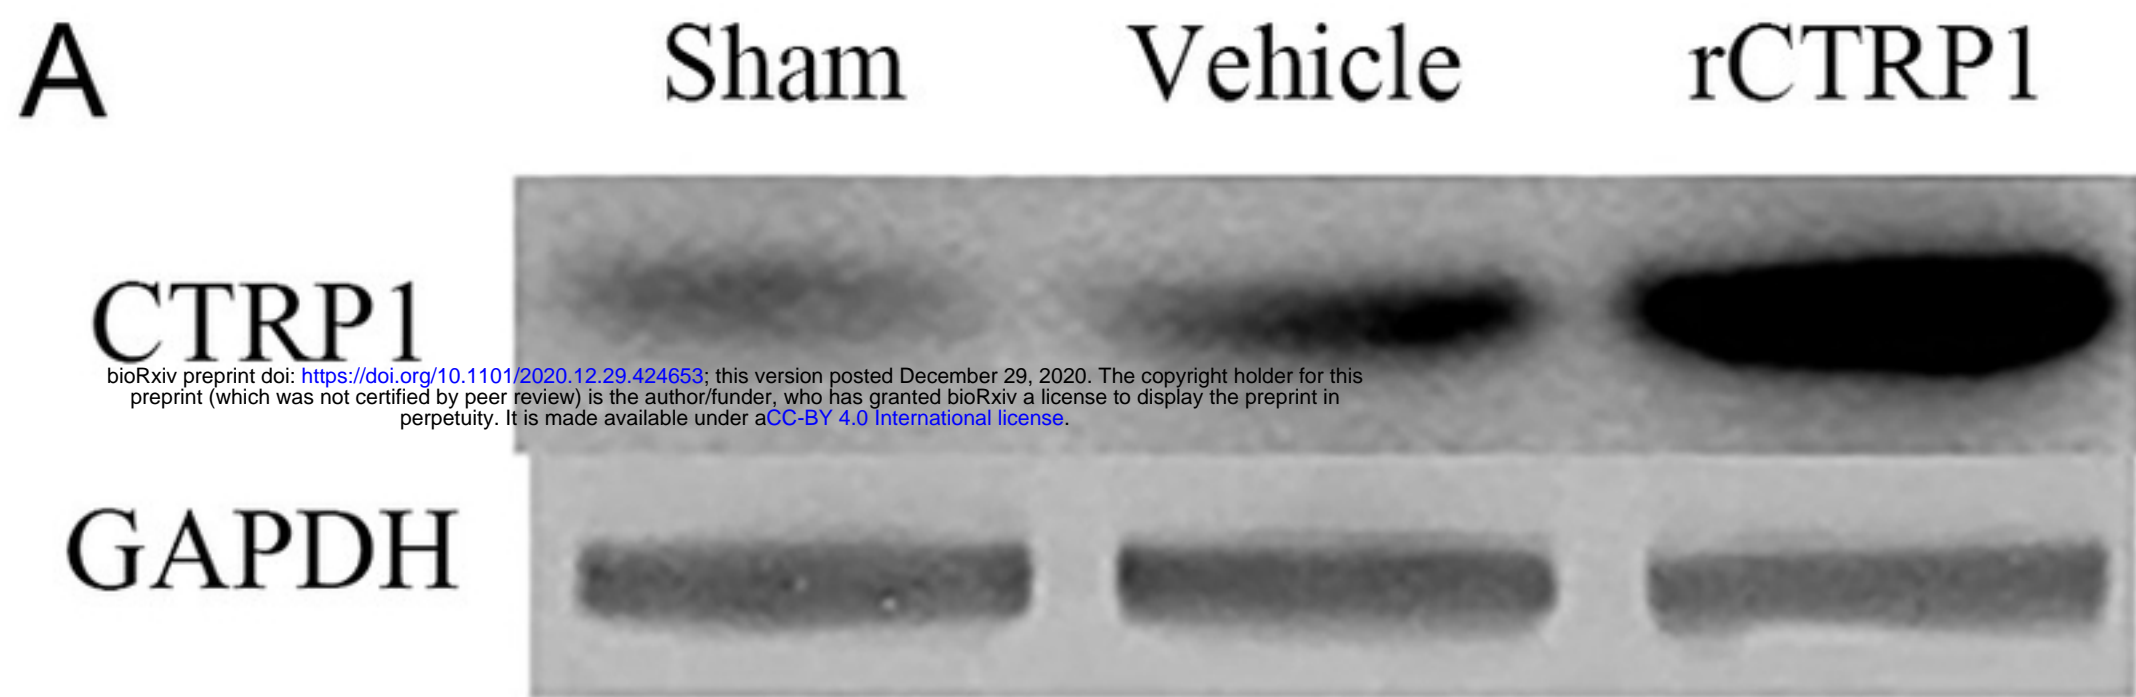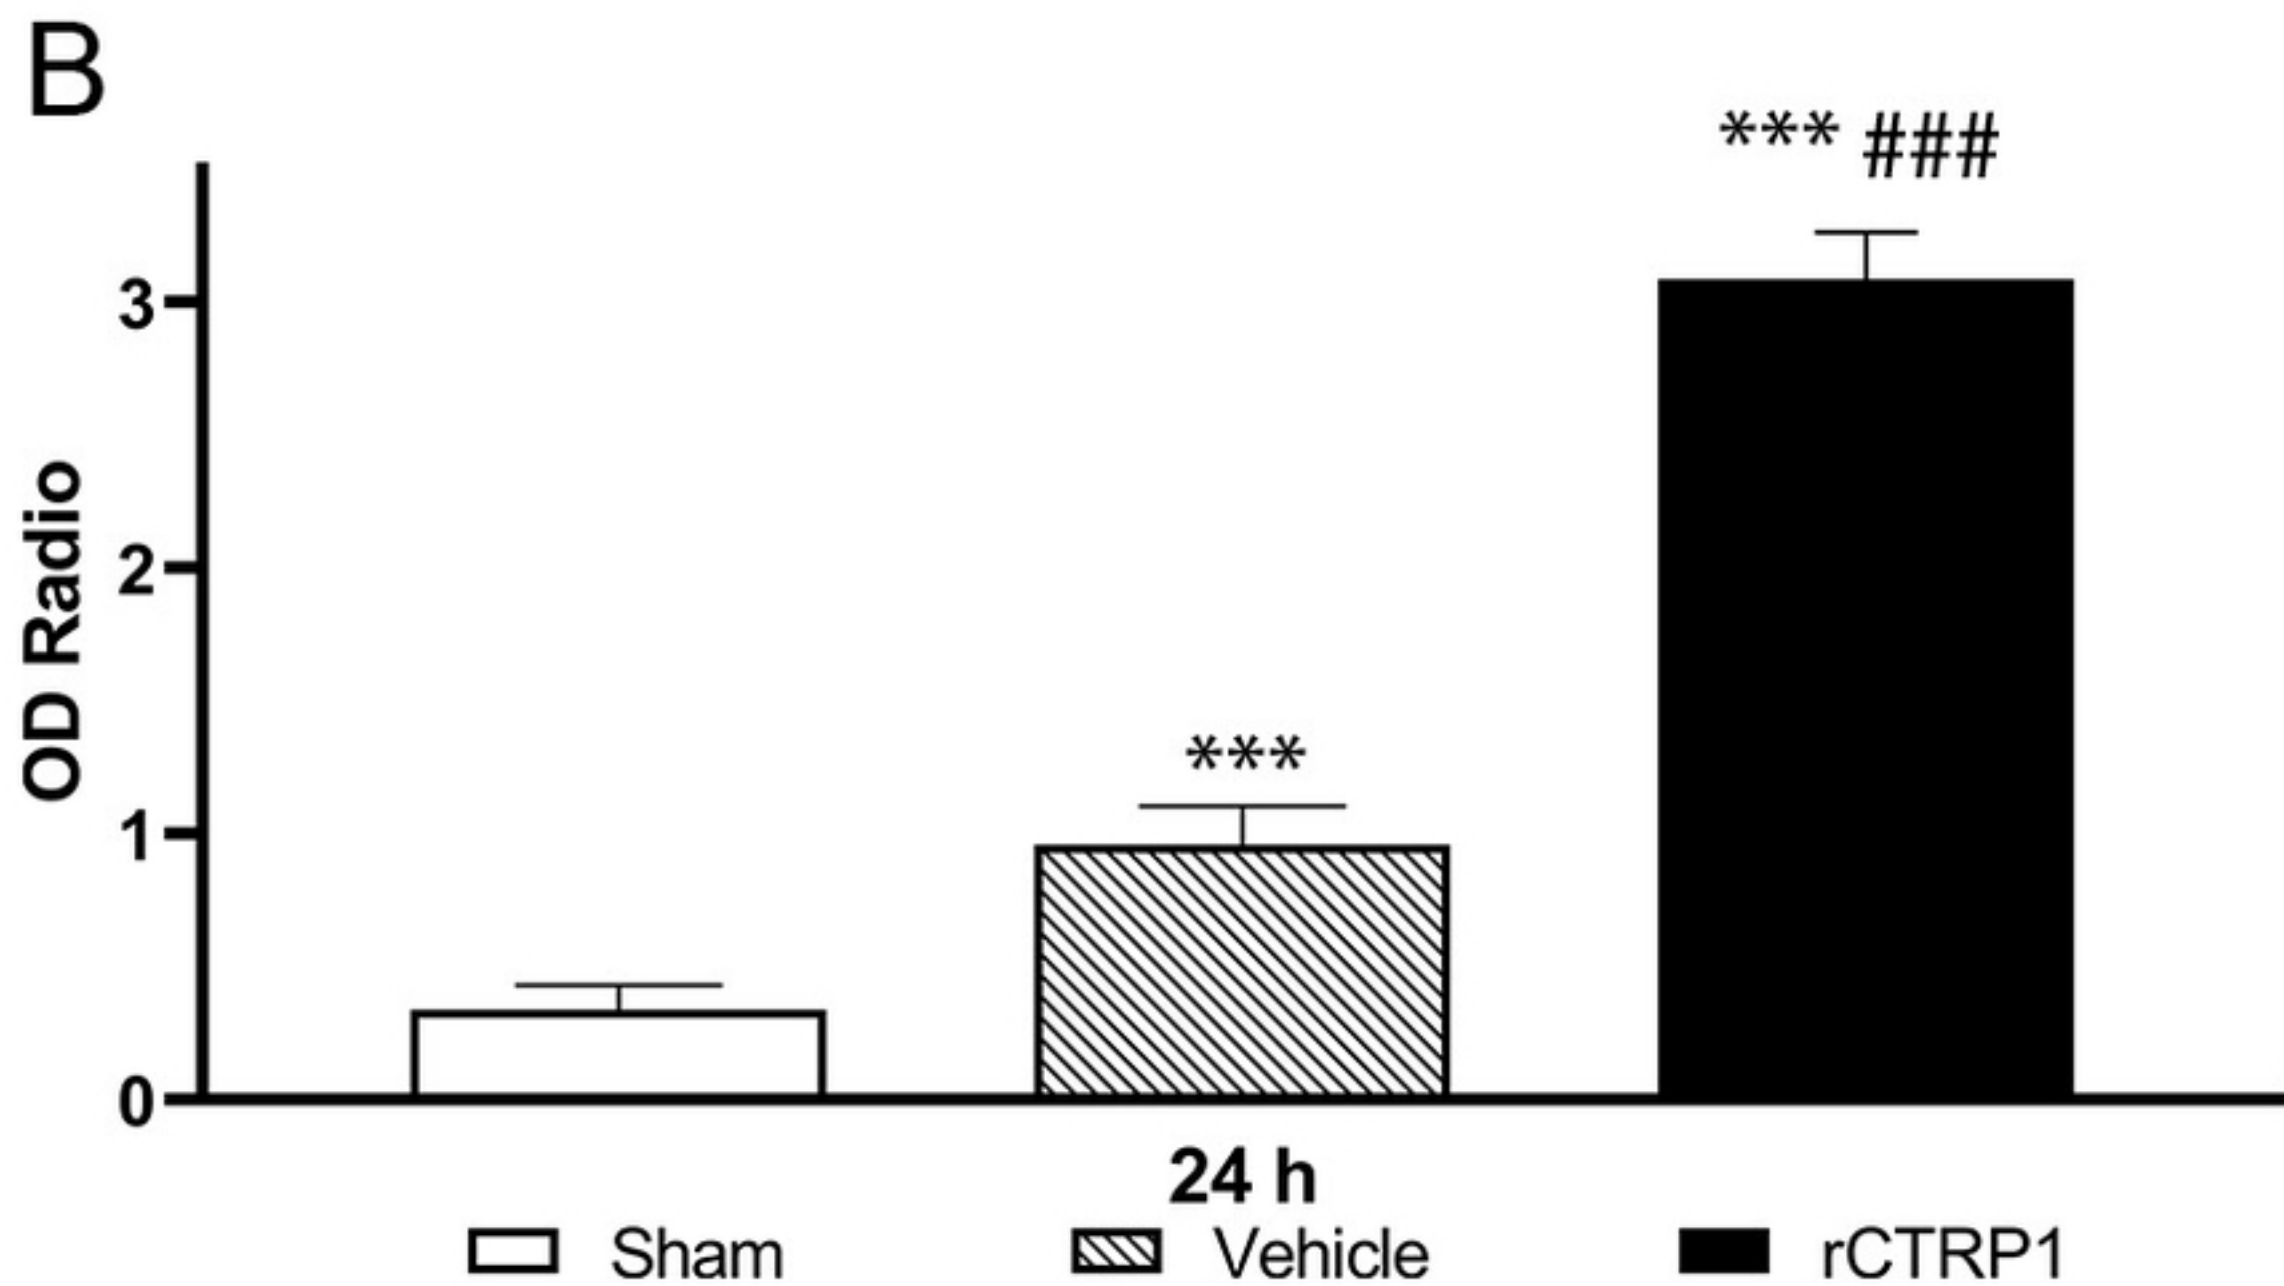

Figure

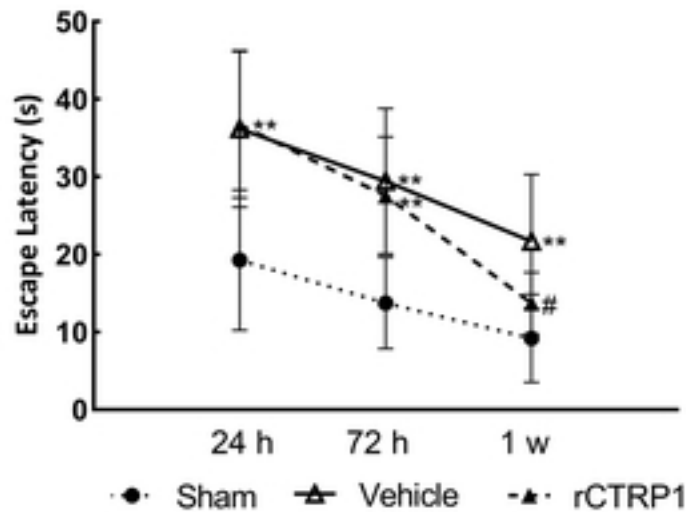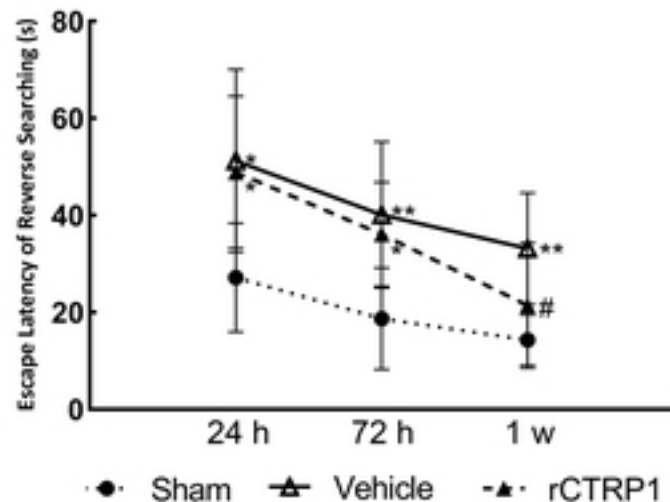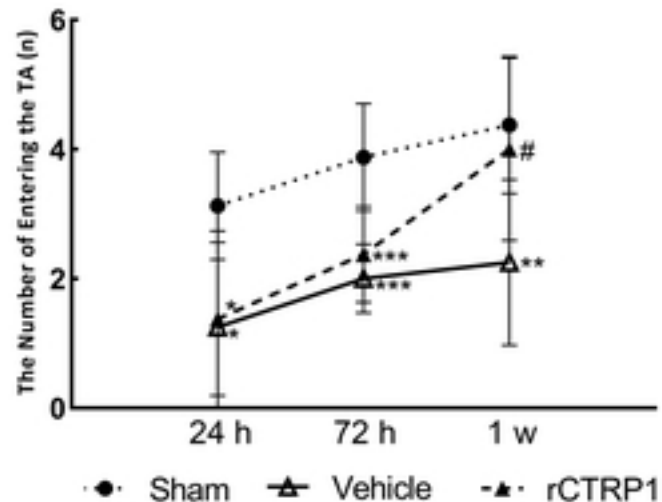

Figure

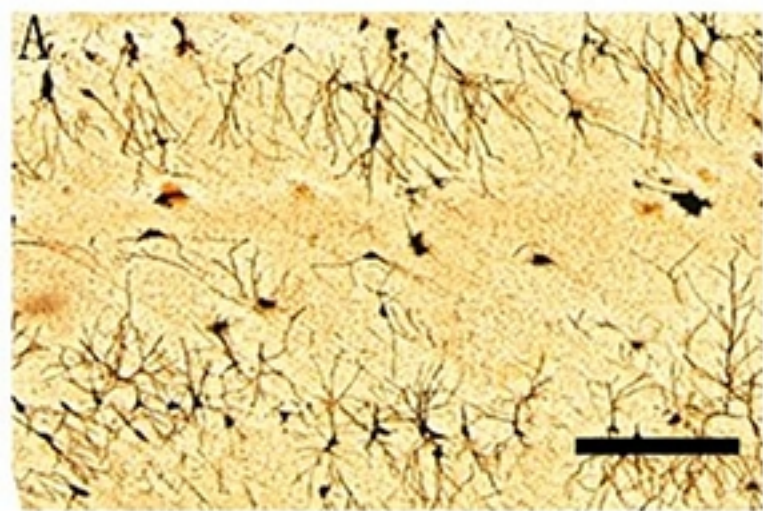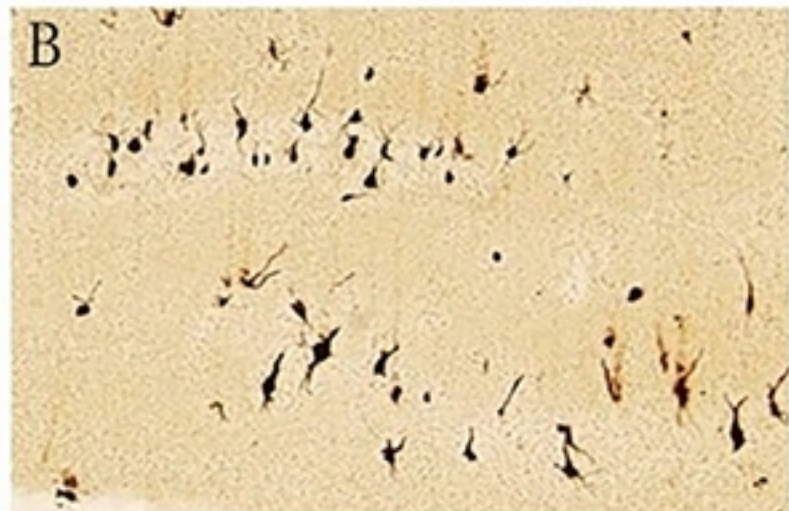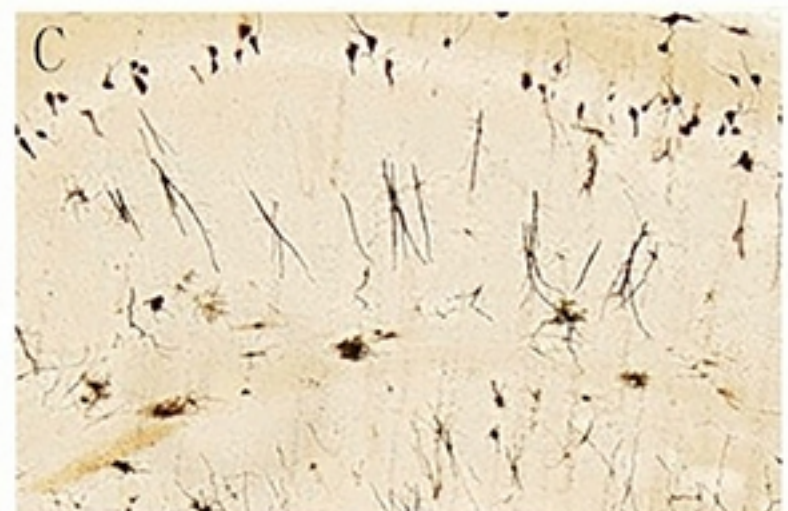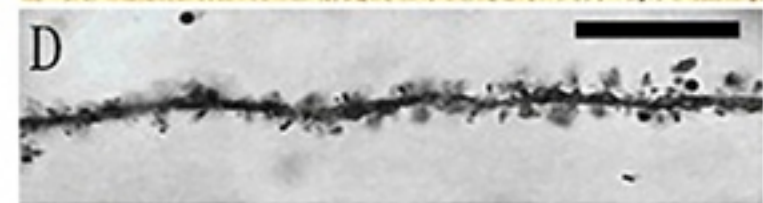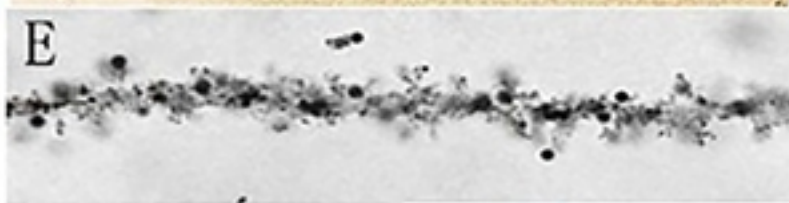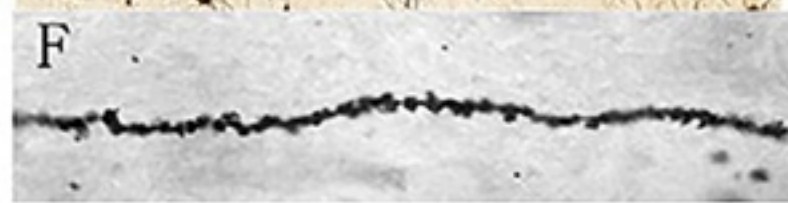

Figure

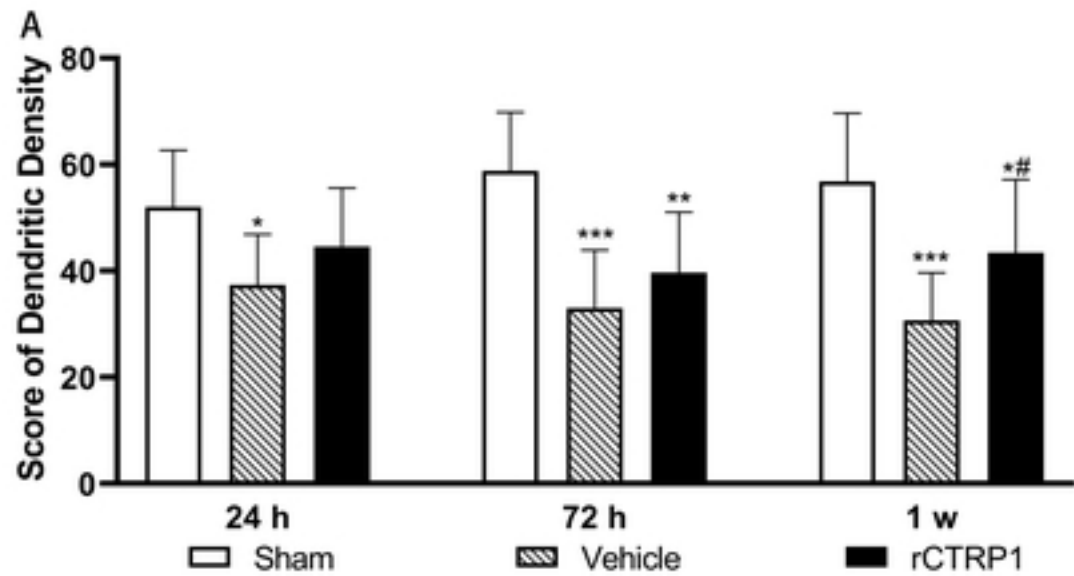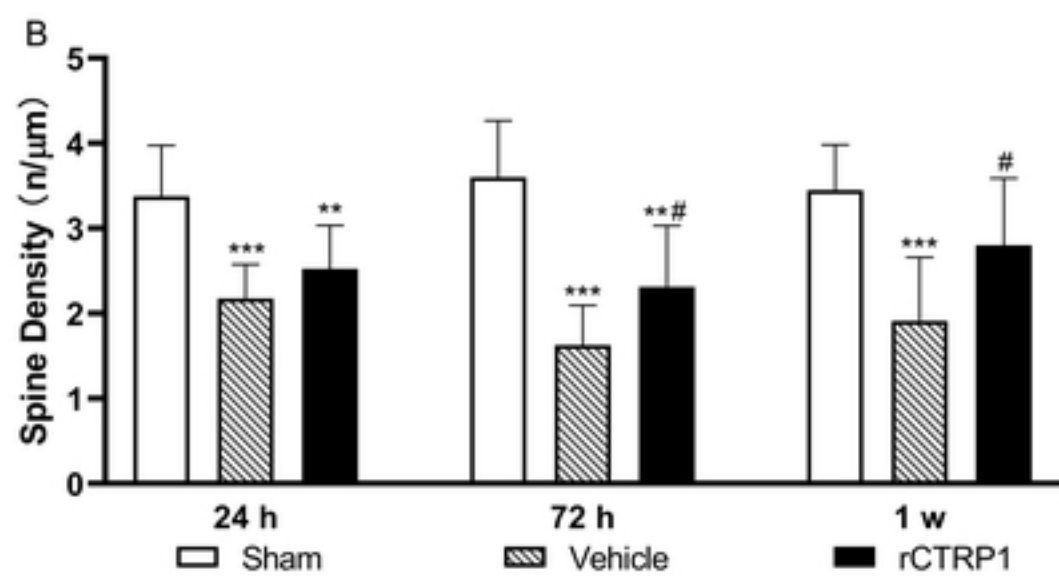

Figure

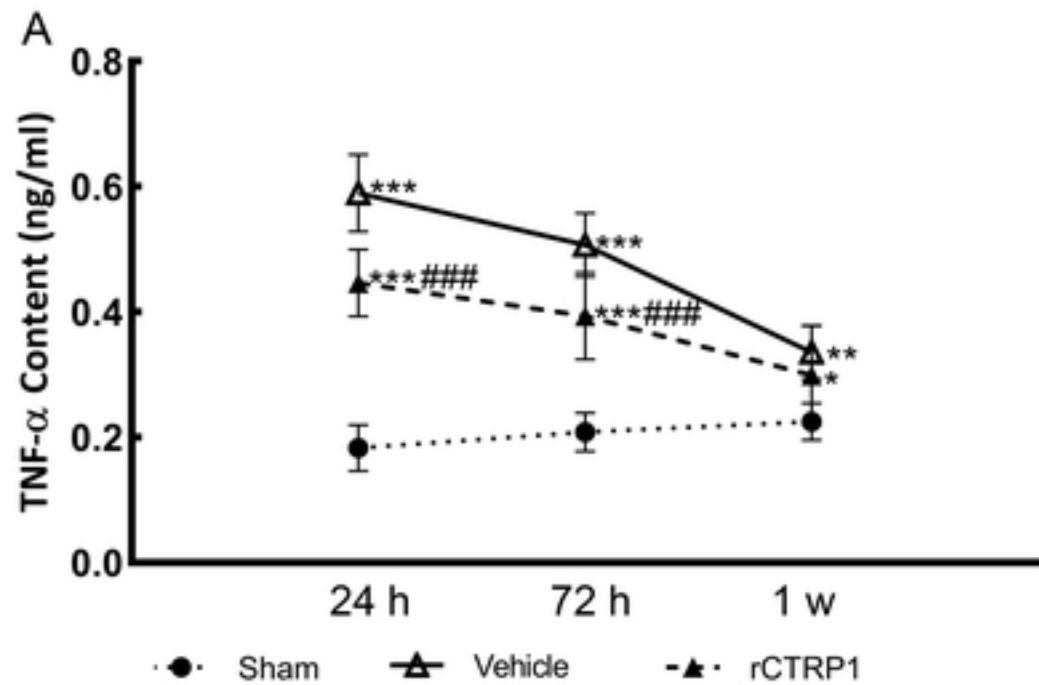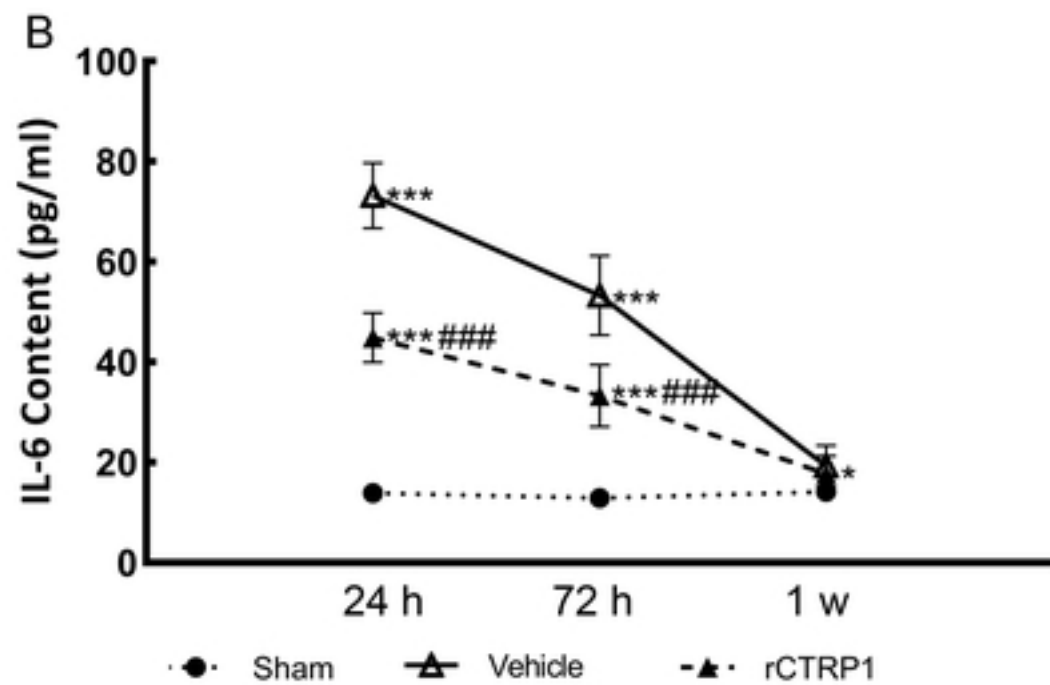

Figure



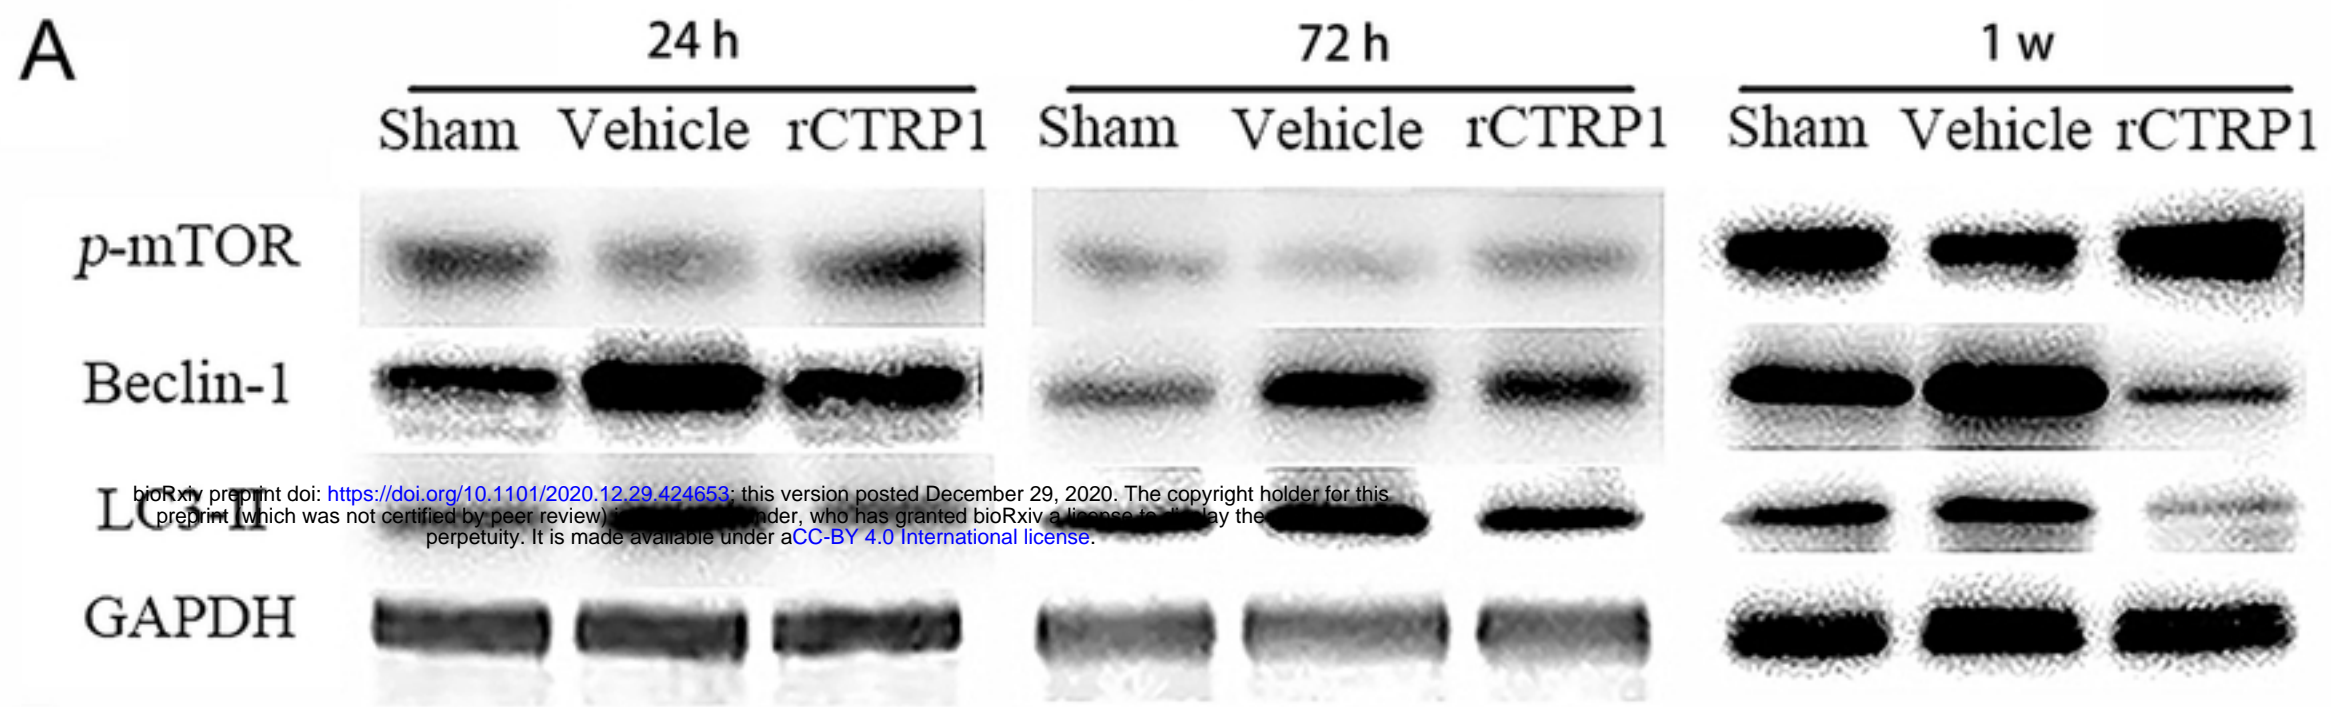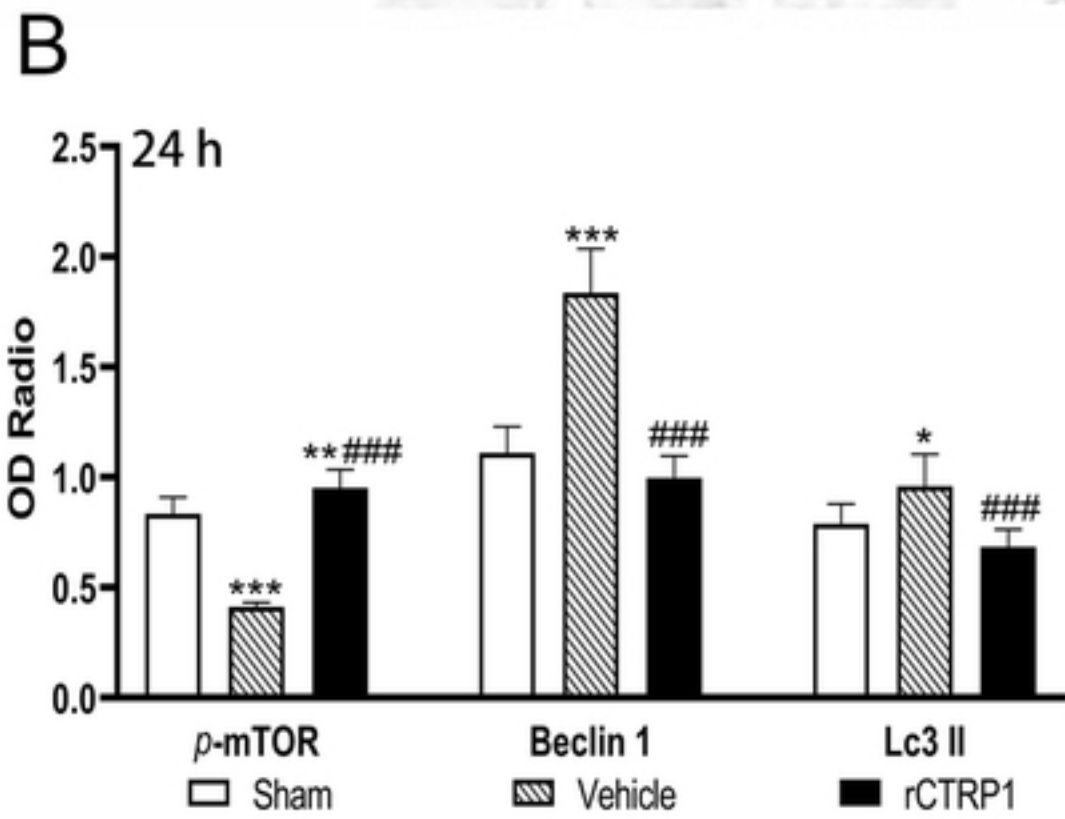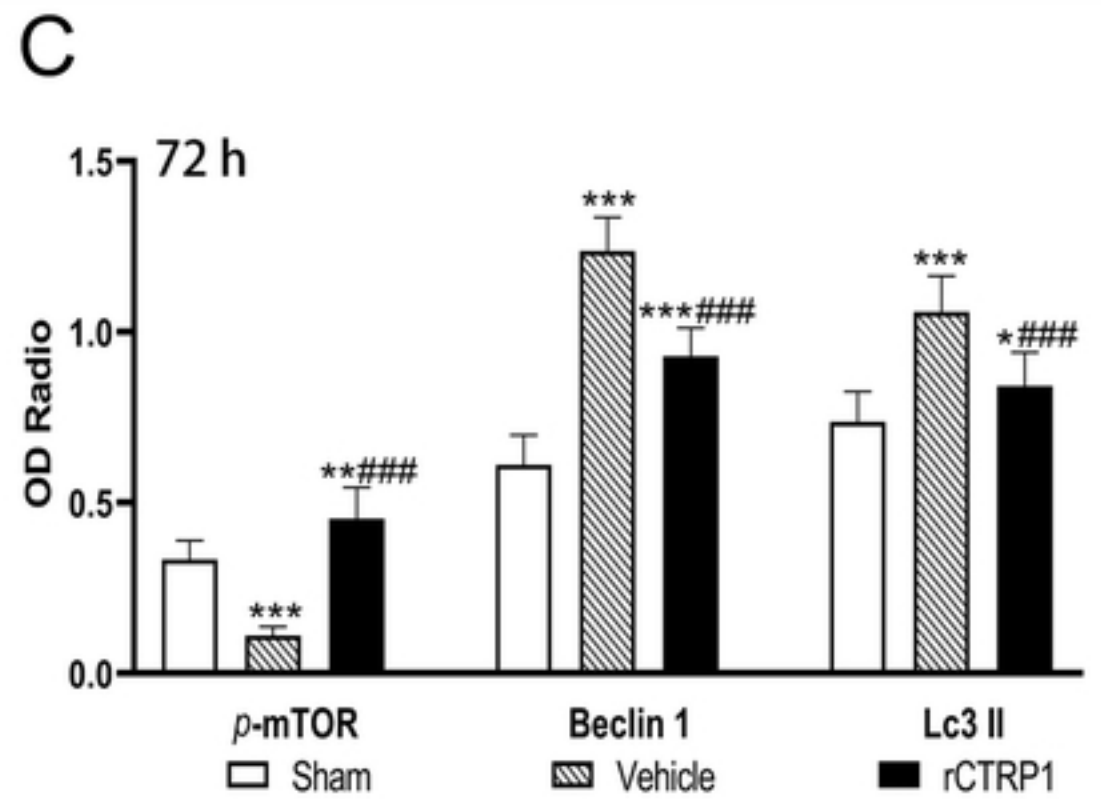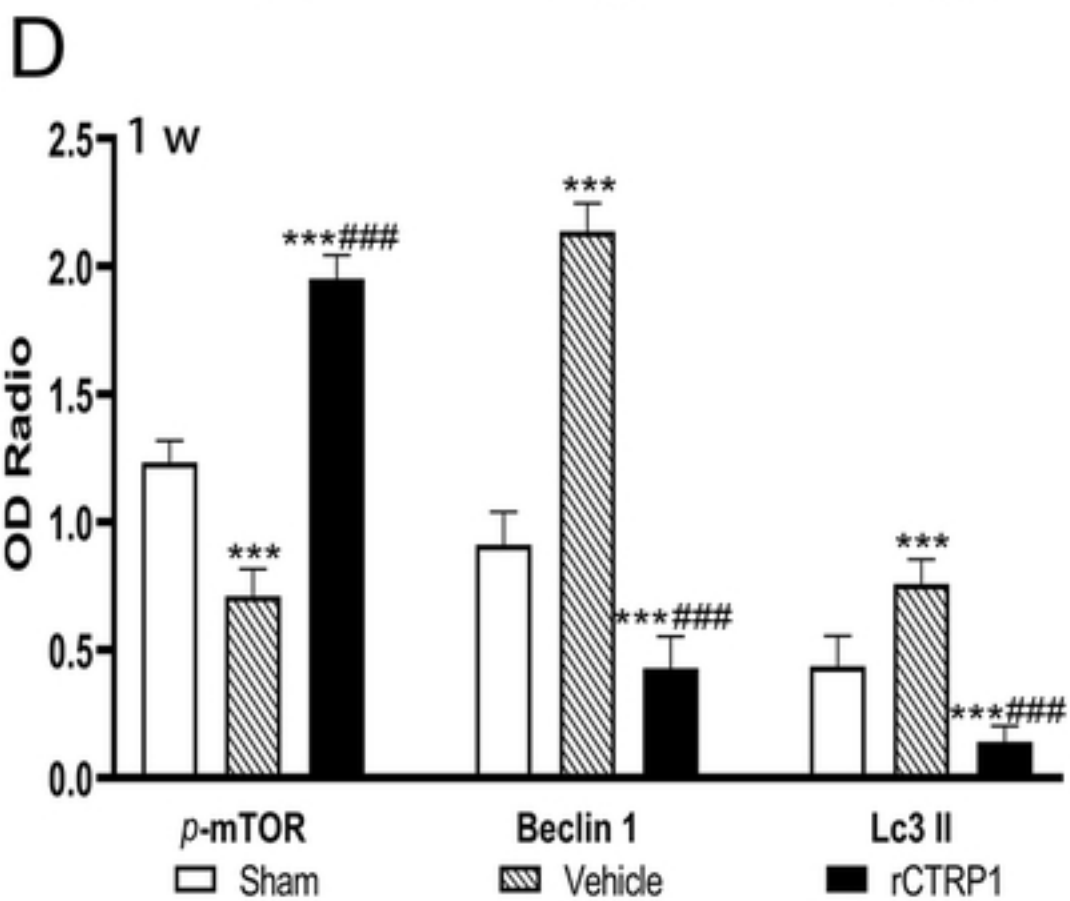

Figure

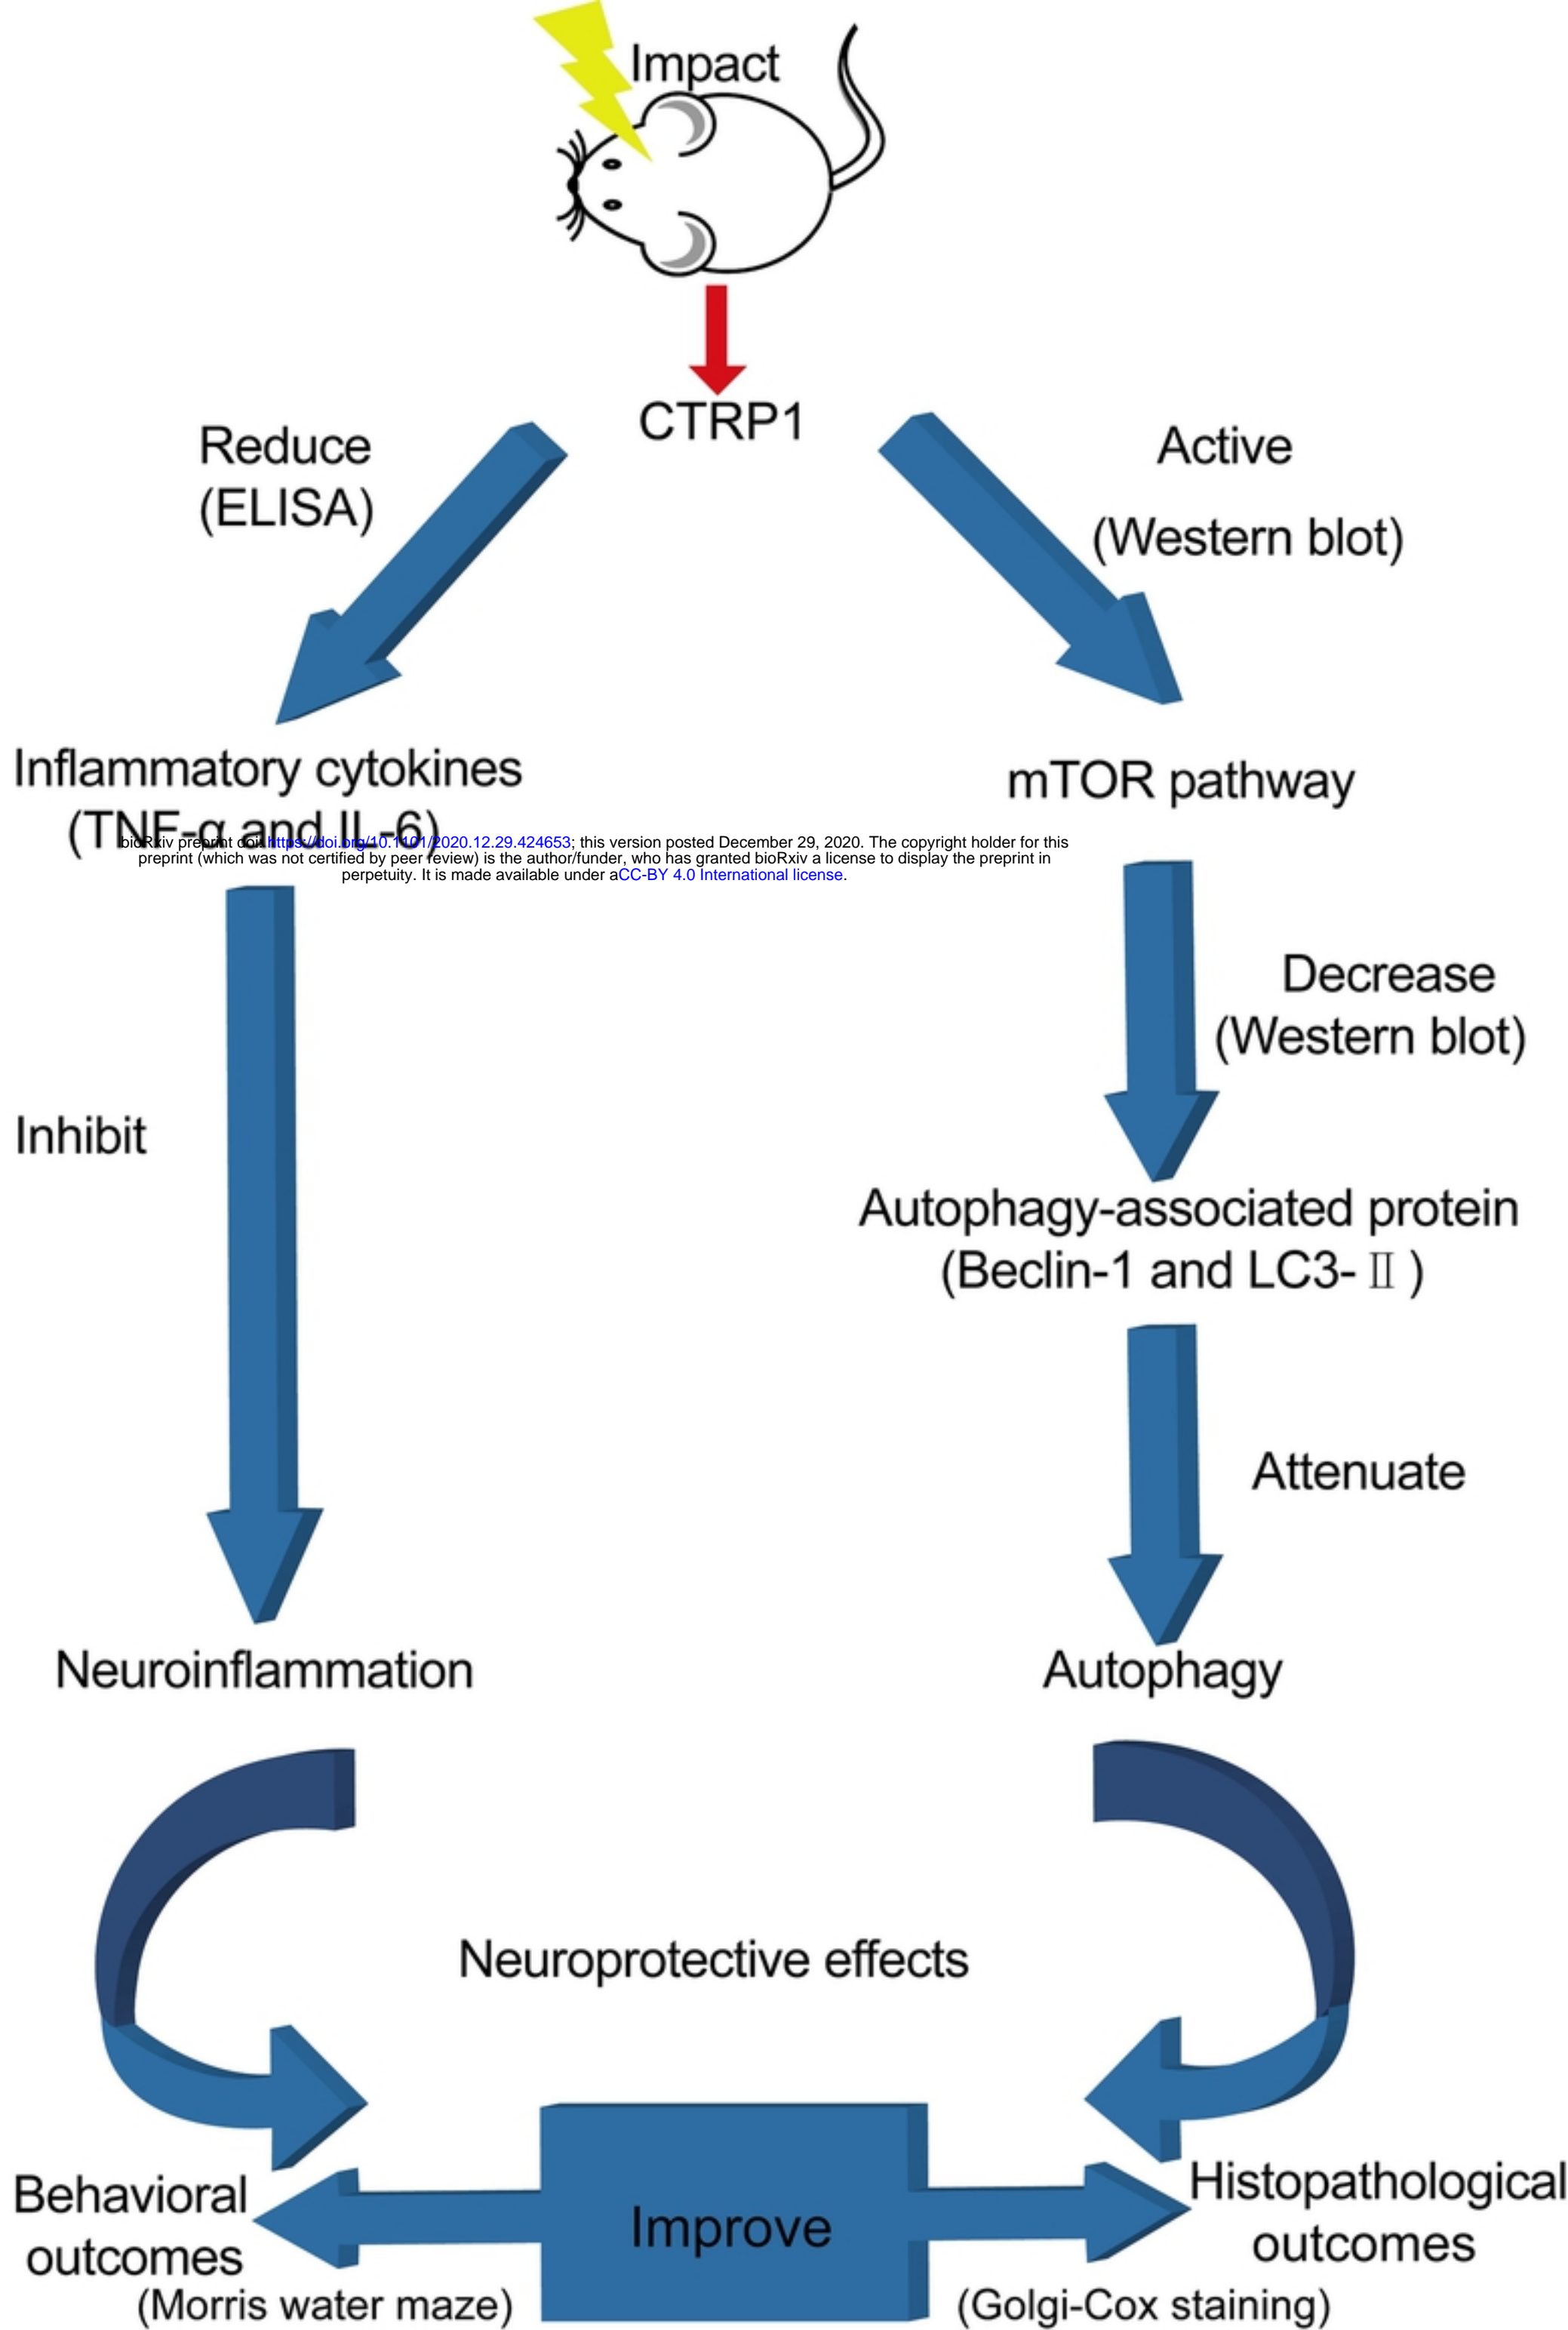

Figure
